# Supplementary material
Source: PubMed Central journal article supplement (PMC5946935)
Supplement: btx828_supp.pdf [file btx828_supp.pdf]

## Supplementary Materials

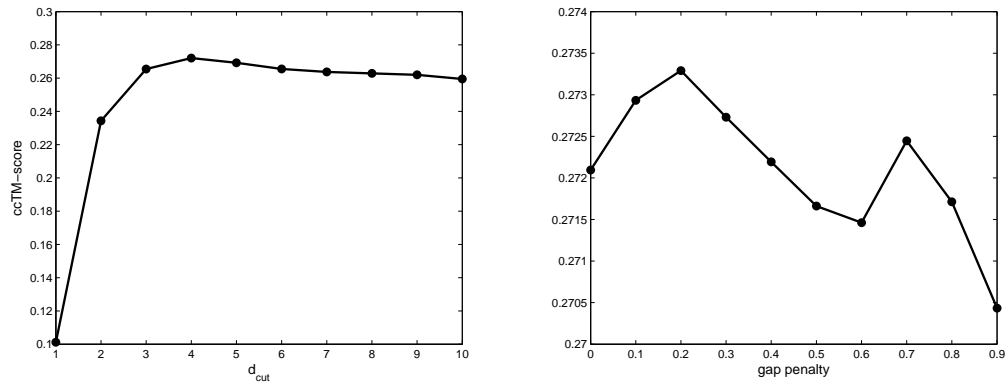

**Figure S1.** Selection of the optimal values for  $d_{cut}$  and gap penalty. The experiments were done on 50% randomly selected groups from the SABmark\_twi dataset. The gap penalty on the left panel is 0 and the  $d_{cut}$  on the right panel is 4.

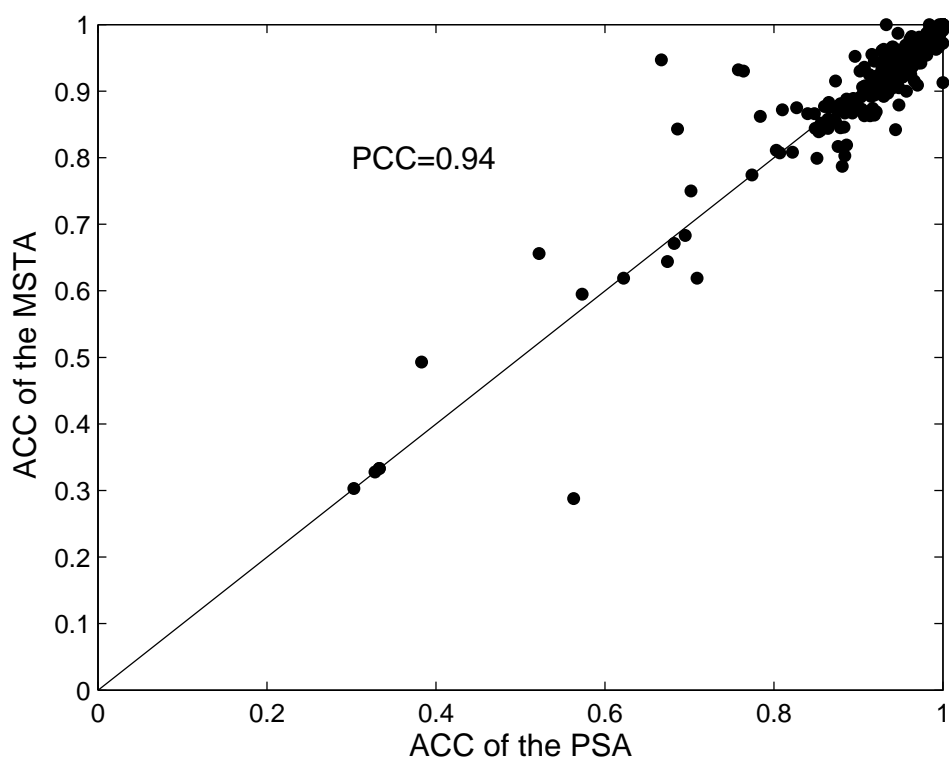

**Figure S2.** The correlation between the accuracy of the PSA and the MSTA. The data used in this figure are available in Table S5.

**Table S1.** The influence of TM-score normalization.  $TM\text{-score}_s/TM\text{-score}_b$  is the mean TM-score normalized by the size of the smaller/bigger protein.  $ccTM\text{-score}_s$  and  $ccTM\text{-score}_b$  are the mean common core TM-scores of the corresponding MSTA.

| Dataset                      | HOMSTRAD | SABmark_sup | SABmark_twi | SISY-multiple |
|------------------------------|----------|-------------|-------------|---------------|
| Number of groups             | 398      | 425         | 209         | 86            |
| Mean length difference       | 17.5     | 34.1        | 43.4        | 65.2          |
| Pairwise $TM\text{-score}_s$ | 0.810    | 0.683       | 0.575       | 0.692         |
| Pairwise $TM\text{-score}_b$ | 0.756    | 0.597       | 0.476       | 0.571         |
| No. of different trees       | 176      | 280         | 152         | 57            |
| $ccTM\text{-score}_s$        | 0.674    | 0.426       | 0.273       | 0.422         |
| $ccTM\text{-score}_b$        | 0.673    | 0.425       | 0.272       | 0.418         |

**Table S2.** The comparison of the mTM-align results for different parameter optimization methods. The numbers before and after ‘/’ are for the optimization with ccTM-score and ACC, respectively. The best results are highlighted in bold type.

| Metrics    | HOMSTRAD            | SABmark_sup         | SABmark_twi         | SISY-multiple       |
|------------|---------------------|---------------------|---------------------|---------------------|
| ACC        | 0.934/ <b>0.946</b> | NA                  | NA                  | NA                  |
| $L_{core}$ | <b>146.6</b> /142.6 | <b>72.9</b> /68.9   | <b>38.1</b> /35     | <b>80.5</b> /76.5   |
| ccRMSD     | 1.3/ <b>1.29</b>    | 1.43/ <b>1.4</b>    | 1.39/ <b>1.32</b>   | <b>1.33</b> /1.33   |
| ccTM-score | <b>0.674</b> /0.659 | <b>0.426</b> /0.407 | <b>0.273</b> /0.255 | <b>0.422</b> /0.405 |
| $L_{ali}$  | <b>173.8</b> /171.7 | <b>112.9</b> /110.7 | <b>76.1</b> /74.5   | <b>135.5</b> /133   |
| RMSD       | <b>1.46</b> /1.48   | <b>1.8</b> /1.84    | <b>2.04</b> /2.08   | <b>1.74</b> /1.79   |
| TM-score   | <b>0.784</b> /0.775 | <b>0.627</b> /0.616 | <b>0.486</b> /0.476 | <b>0.629</b> /0.619 |

**Table S3.** The impact of PSA to mTM-align. Def. represents the default alignment from TM-align. The best results are highlighted in bold type.

| Dataset       | Metrics                 | Def          | IA1   | IA2   | IA3   | IA4   | IA5   |
|---------------|-------------------------|--------------|-------|-------|-------|-------|-------|
| HOMSTRAD      | TM-score of the PSAs    | <b>0.81</b>  | 0.805 | 0.805 | 0.81  | 0.799 | 0.796 |
|               | ccTM-score of the MSTAs | <b>0.674</b> | 0.669 | 0.666 | 0.673 | 0.664 | 0.66  |
|               | TM-score of the MSTAs   | <b>0.784</b> | 0.78  | 0.778 | 0.783 | 0.776 | 0.775 |
| SABmark_sup   | TM-score of the PSAs    | <b>0.683</b> | 0.664 | 0.662 | 0.679 | 0.666 | 0.646 |
|               | ccTM-score of the MSTAs | <b>0.426</b> | 0.407 | 0.402 | 0.42  | 0.408 | 0.388 |
|               | TM-score of the MSTAs   | <b>0.627</b> | 0.611 | 0.611 | 0.623 | 0.612 | 0.597 |
| SABmark_twi   | TM-score of the PSAs    | <b>0.575</b> | 0.54  | 0.536 | 0.566 | 0.554 | 0.52  |
|               | ccTM-score of the MSTAs | <b>0.273</b> | 0.246 | 0.233 | 0.267 | 0.249 | 0.227 |
|               | TM-score of the MSTAs   | <b>0.486</b> | 0.456 | 0.447 | 0.478 | 0.466 | 0.436 |
| SISY-multiple | TM-score of the PSAs    | <b>0.692</b> | 0.669 | 0.665 | 0.685 | 0.672 | 0.637 |
|               | ccTM-score of the MSTAs | <b>0.422</b> | 0.378 | 0.361 | 0.405 | 0.403 | 0.36  |
|               | TM-score of the MSTAs   | <b>0.629</b> | 0.596 | 0.591 | 0.620 | 0.616 | 0.581 |

**Table S4.** The impact of phylogenetic tree to mTM-align. The best results are highlighted in bold type.

| Dataset       | Metrics                 | UPGMA        | NJ    | Random |
|---------------|-------------------------|--------------|-------|--------|
| HOMSTRAD      | ccTM-score of the MSTAs | <b>0.674</b> | 0.669 | 0.668  |
|               | TM-score of the MSTAs   | <b>0.784</b> | 0.782 | 0.781  |
| SABmark_sup   | ccTM-score of the MSTAs | <b>0.426</b> | 0.416 | 0.415  |
|               | TM-score of the MSTAs   | <b>0.627</b> | 0.620 | 0.620  |
| SABmark_twi   | ccTM-score of the MSTAs | <b>0.273</b> | 0.265 | 0.262  |
|               | TM-score of the MSTAs   | <b>0.486</b> | 0.477 | 0.476  |
| SISY-multiple | ccTM-score of the MSTAs | <b>0.422</b> | 0.419 | 0.414  |
|               | TM-score of the MSTAs   | <b>0.629</b> | 0.627 | 0.622  |

**Table S5.** The accuracy of the PSA and the MSTA on the HOMSTRAD dataset. These are the data used to draw Figure S2.

| Family name                                                     | PSA   | MSTA  |
|-----------------------------------------------------------------|-------|-------|
| ATPase family associated with various cellular activities (AAA) | 0.849 | 0.844 |
| bacterial extracellular solute-binding proteins, family 3       | 0.881 | 0.787 |
| amino acid dehydrogenase                                        | 0.966 | 0.915 |
| aminotransferases class-I                                       | 0.956 | 0.952 |
| ABC transporter                                                 | 0.883 | 0.846 |
| alpha beta-hydrolase                                            | 0.965 | 0.957 |
| Acetyltransferase (GNAT) family                                 | 0.967 | 0.971 |
| Histidine acid phosphatase                                      | 0.959 | 0.936 |
| 4'-phosphopantetheinyl transferase superfamily                  | 0.907 | 0.936 |
| actin/heat-shock cognate                                        | 0.962 | 0.940 |
| Adenovirus fiber protein head domain (knob domain)              | 0.977 | 0.973 |
| Adenylosuccinate synthetase                                     | 0.998 | 0.994 |
| actin-depolymerizing proteins                                   | 0.992 | 0.987 |
| alcohol dehydrogenase                                           | 0.998 | 0.996 |
| nucleotide kinase                                               | 0.948 | 0.931 |
| AhpC/TSA family                                                 | 0.989 | 0.982 |
| albumin                                                         | 0.899 | 0.876 |
| Aldehyde oxidase and xanthine dehydrogenase, domains 1-2        | 0.988 | 0.989 |
| Aldehyde oxidase and xanthine dehydrogenase, domains 3-4        | 0.971 | 0.969 |
| Aldehyde dehydrogenase                                          | 0.986 | 0.974 |
| fructose-1,6-bisphosphate aldolase                              | 0.985 | 0.979 |
| aldo/keto reductase                                             | 0.982 | 0.978 |
| Alpha amylase, catalytic domain                                 | 0.953 | 0.945 |
| Alpha amylase, C-terminal domain                                | 0.886 | 0.888 |
| Alpha amylase, catalytic and C-terminal domains                 | 0.929 | 0.924 |
| ankyrin repeats                                                 | 0.985 | 0.988 |
| annexin                                                         | 0.994 | 0.983 |
| Antifreeze protein                                              | 0.995 | 0.995 |
| AP endonuclease family 2                                        | 0.893 | 0.867 |
| bacterial exopeptidases                                         | 0.928 | 0.961 |
| Armadillo/beta-catenin-like repeats                             | 0.333 | 0.333 |
| aspartic proteinase                                             | 0.975 | 0.964 |
| Asp/Glu/Hydontoin racemase domain                               | 0.827 | 0.875 |
| tRNA synthetases class II (D and K)                             | 0.963 | 0.982 |
| ATP-guanido phosphotransferase                                  | 0.954 | 0.945 |
| ATP synthase                                                    | 0.944 | 0.842 |

|                                                                          |       |       |
|--------------------------------------------------------------------------|-------|-------|
| B domain                                                                 | 0.963 | 0.963 |
| Bulb-type mannose-specific lectin                                        | 1.000 | 1.000 |
| Bacterial DNA-binding protein                                            | 0.974 | 0.942 |
| Bacterial luciferase                                                     | 0.947 | 0.962 |
| Bacteriorhodopsin                                                        | 0.984 | 0.992 |
| PQQ enzyme                                                               | 0.985 | 0.994 |
| FERM domain (Band 4.1 family), region 2                                  | 0.963 | 0.953 |
| FERM domain (Band 4.1 family), region 1                                  | 0.972 | 0.981 |
| FERM and ERM domains (Band 4.1 family)                                   | 0.996 | 0.983 |
| Apoptosis regulator proteins, Bcl-2 family                               | 0.913 | 0.925 |
| Clostridial binary toxin A                                               | 0.967 | 0.951 |
| Biotin-requiring enzymes                                                 | 0.904 | 0.873 |
| Inhibitor of Apoptosis domain                                            | 0.902 | 0.930 |
| beta-lactamase                                                           | 0.994 | 0.982 |
| Metallo-beta-lactamase superfamily                                       | 0.935 | 0.950 |
| serine proteinase inhibitor -- Bowman-Birk-type                          | 0.917 | 0.874 |
| Bromodomain                                                              | 0.989 | 0.992 |
| plant virus coat protein                                                 | 0.674 | 0.644 |
| Protein kinase C conserved region 1 (C1) domains (Cysteine-rich domains) | 0.978 | 0.970 |
| Protein kinase C conserved region 2 (CaIb)                               | 0.982 | 0.976 |
| Eukaryotic-type carbonic anhydrase                                       | 0.965 | 0.972 |
| CoA-dependent acetyltransferase                                          | 0.944 | 0.925 |
| carbohydrate binding module family 3                                     | 0.979 | 0.971 |
| carbohydrate binding module family 12                                    | 0.966 | 0.950 |
| Starch binding domain                                                    | 0.941 | 0.966 |
| calcium-binding protein -- calmodulin-like                               | 0.383 | 0.493 |
| CBS domain                                                               | 0.877 | 0.870 |
| complement control protein module (SUSHI) (SCR)                          | 0.940 | 0.944 |
| cadherin                                                                 | 0.958 | 0.942 |
| Calponin homology domain                                                 | 0.973 | 0.948 |
| chorismate binding enzyme                                                | 0.990 | 0.986 |
| chromo (CHRomatin Organization MODifier domain)                          | 0.873 | 0.915 |
| Chitin binding domain                                                    | 0.987 | 0.985 |
| Citrate synthase                                                         | 0.973 | 0.963 |
| cyclin-dependent kinases regulatory subunit                              | 0.945 | 0.945 |
| Colicin pore forming domain                                              | 0.970 | 0.959 |
| Colicin immunity protein / pyocin immunity protein                       | 0.996 | 0.996 |
| GMC oxidoreductase                                                       | 0.948 | 0.950 |
| Cytochrome C oxidase subunit II                                          | 0.979 | 0.973 |



|                                                                                                  |       |       |
|--------------------------------------------------------------------------------------------------|-------|-------|
| Cytochrome c oxidase subunit III                                                                 | 0.987 | 0.988 |
| zinc carboxypeptidases                                                                           | 0.996 | 0.995 |
| TCP-1/cpn60 chaperonin family, apical domain                                                     | 0.933 | 0.934 |
| Biotin carboxylase/Carbamoyl phosphate synthetase                                                | 0.890 | 0.873 |
| Carbamoyl-phosphate synthase L chain and Phosphoribosylglycinamide synthetase, N-terminal domain | 0.851 | 0.799 |
| beta/gamma crystallins                                                                           | 0.573 | 0.595 |
| cold-shock DNA-binding domain                                                                    | 0.990 | 0.985 |
| Copper amine oxidase                                                                             | 0.978 | 0.975 |
| Plastocyanin-like domain                                                                         | 0.951 | 0.959 |
| copper-containing nitrite reductase                                                              | 0.999 | 1.000 |
| Domain first found in C1r, C1s, uEGF, and bone morphogenetic protein.                            | 0.984 | 0.990 |
| Cyclin                                                                                           | 0.953 | 0.922 |
| cyclophilin (peptidylprolyl isomerase)                                                           | 0.982 | 0.977 |
| Cyclodextrin glycosyltransferase                                                                 | 0.995 | 0.994 |
| Cyclotide family                                                                                 | 0.879 | 0.881 |
| Papain family cysteine proteinase                                                                | 0.977 | 0.971 |
| 3C cysteine protease (picornain 3C)                                                              | 0.947 | 0.987 |
| Cystathionine synthase                                                                           | 0.992 | 0.963 |
| cystatin                                                                                         | 0.919 | 0.894 |
| cytochrome-c3                                                                                    | 0.962 | 0.960 |
| cytochrome-c5                                                                                    | 0.932 | 0.912 |
| cytochrome b5                                                                                    | 0.970 | 0.960 |
| cytochrome c                                                                                     | 0.986 | 0.983 |
| cytokine -- granulocyte colony stimulating factor                                                | 1.000 | 1.000 |
| cytochrome c'                                                                                    | 0.982 | 0.983 |
| DAHP synthetase I family                                                                         | 0.969 | 0.958 |
| Cytidine and deoxycytidylate deaminase zinc-binding region                                       | 0.968 | 0.964 |
| subset of the extended AAA-ATPase domain family including DEAD/DEAH box helicases                | 0.928 | 0.933 |
| DEATH domain, found in proteins involved in cell death (apoptosis)                               | 0.914 | 0.863 |
| dihydrofolate reductase                                                                          | 0.961 | 0.973 |
| DHH family                                                                                       | 0.996 | 0.996 |
| DHHA2 domain                                                                                     | 1.000 | 1.000 |
| Dihydroorotate dehydrogenase                                                                     | 0.971 | 0.960 |
| Homologues of snake disintegrins                                                                 | 0.822 | 0.808 |
| 6,7-dimethyl-8-ribityllumazine synthase                                                          | 0.965 | 0.961 |
| DNA polymerase III beta subunit                                                                  | 0.970 | 0.961 |
| DNA polymerase processivity factor                                                               | 0.865 | 0.883 |
| DNA polymerase I                                                                                 | 0.961 | 0.930 |
| Double-stranded RNA binding motif                                                                | 0.945 | 0.956 |

---

|                                                                                                  |       |       |
|--------------------------------------------------------------------------------------------------|-------|-------|
| ThiS family                                                                                      | 0.963 | 0.950 |
| deoxyuridine 5'-triphosphate nucleotidohydrolase                                                 | 0.964 | 0.937 |
| E2 (early) protein, C terminal                                                                   | 0.991 | 0.991 |
| enoyl-CoA hydratase                                                                              | 0.976 | 0.973 |
| Elongation factor TS, dimerization domain                                                        | 0.667 | 0.947 |
| EF-1 guanine nucleotide exchange domain                                                          | 0.957 | 0.900 |
| Elongation factor Tu (EF-Tu), domain 2                                                           | 0.990 | 0.992 |
| Elongation factor Tu (EF-Tu), C-terminal domain                                                  | 1.000 | 1.000 |
| epidermal growth factor-like domain                                                              | 0.840 | 0.866 |
| Laminin-type epidermal growth factor-like domain                                                 | 0.972 | 0.972 |
| ENTH domain                                                                                      | 0.960 | 0.928 |
| NAD dependent epimerase/dehydratase family                                                       | 0.977 | 0.965 |
| ETS domain                                                                                       | 0.930 | 0.963 |
| Extradiol ring-cleavage dioxygenase                                                              | 0.985 | 0.984 |
| Fatty acid binding protein-like                                                                  | 0.980 | 0.965 |
| FAD linked oxidases, C-terminal domain                                                           | 0.764 | 0.930 |
| FAD linked oxidases                                                                              | 0.886 | 0.819 |
| FAD binding domain                                                                               | 0.904 | 0.872 |
| Formamidopyrimidine-DNA glycosylase                                                              | 0.978 | 0.976 |
| fructose-1,6-bisphosphatase                                                                      | 0.995 | 0.997 |
| ferredoxin (2Fe-2S)                                                                              | 0.944 | 0.931 |
| ferredoxin (4Fe-4S)                                                                              | 0.884 | 0.867 |
| ferritin                                                                                         | 1.000 | 1.000 |
| Fibrinogen beta and gamma chains, C-terminal globular domain                                     | 0.977 | 0.972 |
| Filamin/ABP280 repeat                                                                            | 0.907 | 0.863 |
| FKBP-type peptidyl-prolyl cis-trans isomerase                                                    | 0.995 | 0.995 |
| flavodoxin                                                                                       | 0.958 | 0.953 |
| Fibronectin type I domain                                                                        | 0.970 | 0.909 |
| fibronectin type III domain                                                                      | 0.894 | 0.889 |
| Fork head domain                                                                                 | 0.875 | 0.870 |
| GAF domain                                                                                       | 0.959 | 0.944 |
| GAL4-like Zn(II) <sub>2</sub> Cys <sub>6</sub> (or C6 zinc) binuclear cluster DNA-binding domain | 1.000 | 1.000 |
| heterotrimeric G proteins - alpha subunit                                                        | 0.997 | 0.991 |
| GATA zinc finger                                                                                 | 0.884 | 0.803 |
| Glutamine amidotransferase class-I                                                               | 0.961 | 0.978 |
| Glutamine amidotransferases class-II                                                             | 0.975 | 0.964 |
| Paralytic/GBP/PSP peptide                                                                        | 0.944 | 0.944 |
| Gelsolin homology domain                                                                         | 0.955 | 0.939 |
| glycosyl hydrolase family 1                                                                      | 0.978 | 0.979 |

---

---

|                                                                                       |       |       |
|---------------------------------------------------------------------------------------|-------|-------|
| glycosyl hydrolases family 10                                                         | 0.965 | 0.962 |
| glycosyl hydrolase family 11                                                          | 0.979 | 0.961 |
| glycosyl hydrolase family 14 (beta-amylase)                                           | 0.995 | 0.987 |
| glycosyl hydrolases family 18                                                         | 0.876 | 0.817 |
| glycosyl hydrolase family 22 (lysozyme)                                               | 0.985 | 0.975 |
| glycosyl hydrolase family 33 (sialidases or neuraminidases)                           | 0.951 | 0.937 |
| glycosyl hydrolase family 34 (neuraminidase)                                          | 0.981 | 0.987 |
| glycosyl hydrolase family 5                                                           | 0.928 | 0.895 |
| glycosyl hydrolases family 6                                                          | 0.963 | 0.971 |
| glycosyl hydrolase family 7                                                           | 0.985 | 0.975 |
| Domain containing Gla (gamma-carboxyglutamate) residues                               | 0.948 | 0.905 |
| glutaminase-asparaginase                                                              | 0.995 | 0.994 |
| glutathione S-transferase                                                             | 0.984 | 0.972 |
| Glycosyl hydrolases family 18, TIM barrel domain and insertion domain                 | 0.969 | 0.977 |
| Glycosyl hydrolases family 18, TIM barrel domain                                      | 0.977 | 0.971 |
| Glycosyl hydrolases family 18, insertion domain                                       | 0.944 | 0.912 |
| Glycosyl hydrolases family 2, immunoglobulin-like beta-sandwich domain                | 0.563 | 0.288 |
| glyceraldehyde 3-phosphate dehydrogenase                                              | 0.977 | 0.980 |
| glucose permease                                                                      | 0.989 | 0.991 |
| pyridine nucleotide-disulphide oxidoreductases class-I                                | 0.922 | 0.923 |
| GTP-binding protein                                                                   | 0.957 | 0.940 |
| Haloperoxidase                                                                        | 0.948 | 0.919 |
| Histidine kinase-, DNA gyrase B-, and HSP90-like ATPase                               | 0.905 | 0.906 |
| Helicase conserved C-terminal domain                                                  | 0.853 | 0.839 |
| Helicase                                                                              | 0.865 | 0.876 |
| hemopexin-like                                                                        | 0.969 | 0.978 |
| Bacterial transferase hexapeptide repeats                                             | 0.328 | 0.328 |
| Hexokinase                                                                            | 0.995 | 0.966 |
| Anticodon binding domain                                                              | 0.979 | 0.969 |
| high potential iron-sulfur protein                                                    | 0.962 | 0.955 |
| Nucleosome core histone H2A/H2B/H3/H4                                                 | 0.906 | 0.895 |
| histocompatibility antigen-binding domain                                             | 1.000 | 1.000 |
| Helix-loop-helix DNA-binding domain                                                   | 0.758 | 0.932 |
| Heavy-metal-associated domain                                                         | 0.958 | 0.958 |
| HMG (high mobility group) box                                                         | 0.848 | 0.866 |
| DNA-binding homeodomain                                                               | 0.984 | 0.981 |
| Ligand-binding domain of nuclear hormone receptors                                    | 0.955 | 0.954 |
| hormone receptor (DNA-binding domain)                                                 | 0.958 | 0.955 |
| Bacterial regulatory helix-turn-helix proteins, araC family, single structural repeat | 0.938 | 0.917 |

---

---

|                                                               |       |       |
|---------------------------------------------------------------|-------|-------|
| Huristasin-like                                               | 0.908 | 0.908 |
| isocitrate and isopropylmalate dehydrogenase                  | 0.975 | 0.950 |
| immunoglobulin domain -- C1 set - constant non immunoglobulin | 0.978 | 0.978 |
| immunoglobulin domain -- C1 set - constant immunoglobulin     | 0.951 | 0.938 |
| immunoglobulin domain -- I set                                | 0.929 | 0.924 |
| tryptophan biosynthesis enzyme                                | 0.866 | 0.877 |
| immunoglobulin domain -- V set - variable non immunoglobulin  | 0.946 | 0.932 |
| immunoglobulin domain -- V set - immunoglobulin heavy chain   | 0.994 | 0.988 |
| immunoglobulin domain -- V set - immunoglobulin light chain   | 0.986 | 0.979 |
| interleukin 8-like protein                                    | 0.860 | 0.877 |
| Inositol monophosphatase family                               | 0.929 | 0.936 |
| insulin                                                       | 0.907 | 0.902 |
| integrin I-domain                                             | 0.975 | 0.977 |
| interleukin 1-beta-like growth factor                         | 0.941 | 0.941 |
| invasin                                                       | 0.948 | 0.933 |
| Chalcone and stilbene synthases                               | 0.969 | 0.950 |
| serine proteinase inhibitor -- Kazal-type                     | 0.930 | 0.946 |
| serine carboxypeptidase                                       | 0.952 | 0.951 |
| Serine/Threonine protein kinases, catalytic domain            | 0.949 | 0.919 |
| Kinesin motor, catalytic domain ATPase                        | 0.989 | 0.984 |
| kringle domain                                                | 0.963 | 0.936 |
| serine proteinase inhibitor -- Kunitz-type                    | 0.930 | 0.909 |
| Bacterial regulatory proteins, lacI family                    | 0.919 | 0.864 |
| maltoporin (LamB protein)                                     | 0.980 | 0.969 |
| Laminin G domain                                              | 0.927 | 0.906 |
| lactate/malate dehydrogenase                                  | 0.967 | 0.954 |
| Low-density lipoprotein receptor domain class A               | 0.880 | 0.872 |
| Leukocidin (pore-forming toxin)                               | 1.000 | 1.000 |
| Levivirus coat protein                                        | 0.984 | 0.963 |
| CoA-ligase C-terminal domain                                  | 0.997 | 0.997 |
| Zinc-binding domain present in Lin-11, Isl-1, Mec-3.          | 0.686 | 0.843 |
| pancreatic lipase                                             | 0.996 | 0.995 |
| fungal lipase                                                 | 0.983 | 0.971 |
| Lipocalin family                                              | 0.936 | 0.925 |
| Low molecular weight phosphatase                              | 0.995 | 0.998 |
| ribonuclease inhibitor                                        | 0.333 | 0.333 |
| heat-labile enterotoxin/cholera toxin, A subunit              | 0.993 | 0.996 |
| heat-labile enterotoxin/cholera toxin, B subunit              | 0.996 | 0.984 |
| legume lectin                                                 | 0.983 | 0.984 |

---

---

|                                                              |       |       |
|--------------------------------------------------------------|-------|-------|
| Lumazine binding domain                                      | 0.984 | 0.980 |
| LuxS protein                                                 | 0.994 | 0.995 |
| Lyase                                                        | 0.965 | 0.944 |
| Methyl-coenzyme M reductase alpha subunit, C-terminal domain | 0.996 | 1.000 |
| Methyl-coenzyme M reductase alpha subunit, N-terminal domain | 0.990 | 0.992 |
| Methyl-coenzyme M reductase alpha subunit                    | 0.993 | 0.996 |
| Methyl-coenzyme M reductase beta subunit, C-terminal domain  | 1.000 | 1.000 |
| Methyl-coenzyme M reductase beta subunit, N-terminal domain  | 1.000 | 1.000 |
| Methyl-coenzyme M reductase beta subunit                     | 1.000 | 1.000 |
| Methyl-coenzyme M reductase gamma subunit                    | 0.997 | 0.996 |
| acyl-CoA dehydrogenase                                       | 0.996 | 0.995 |
| 6-O-methylguanine DNA methyltransferase                      | 0.864 | 0.844 |
| Class II histocompatibility antigen, alpha chain             | 0.971 | 0.976 |
| Class II histocompatibility antigen, beta chain              | 0.986 | 0.965 |
| Class II histocompatibility antigen, C-terminal domain       | 0.984 | 0.977 |
| Class II histocompatibility antigen, N-terminal domain       | 0.930 | 0.892 |
| Macrophage migration inhibitory factor (MIF)                 | 0.994 | 0.994 |
| muconate lactonizing enzyme-like                             | 0.993 | 0.979 |
| Cobalamin (vitamin B12)-binding domain                       | 0.856 | 0.852 |
| Monoxygenase (hydroxylase) regulatory protein                | 0.695 | 0.683 |
| Ipha plus beta                                               | 0.991 | 0.990 |
| Probable molybdopterin binding domain                        | 0.957 | 0.950 |
| nitrogenase molybdenum-iron protein, alpha and beta chains   | 0.962 | 0.925 |
| Prokaryotic molybdopterin oxidoreductases                    | 0.925 | 0.912 |
| C-type lectin                                                | 0.941 | 0.905 |
| metallothionein -- alpha-domain                              | 1.000 | 1.000 |
| metallothionein -- beta-domain                               | 0.810 | 0.872 |
| Mur ligase family, glutamate ligase domain                   | 0.879 | 0.845 |
| Myb-like DNA-binding domain                                  | 0.915 | 0.892 |
| antibacterial protein                                        | 0.976 | 0.964 |
| NAD(P)H dehydrogenase (quinone)                              | 0.997 | 0.997 |
| nucleotide diphosphate kinase                                | 0.995 | 0.992 |
| short-chain scorpion toxin                                   | 0.955 | 0.955 |
| nerve growth factor                                          | 0.973 | 0.973 |
| Nickel-dependent hydrogenases, large subunit                 | 0.996 | 0.994 |
| Nitroreductase                                               | 0.931 | 0.921 |
| Nitric oxide synthase, oxygenase domain                      | 0.999 | 0.998 |
| Nucleotidyltransferase, domain 2                             | 0.959 | 0.959 |
| Nucleotidyl transferase                                      | 0.963 | 0.970 |

---

---

|                                                            |       |       |
|------------------------------------------------------------|-------|-------|
| aminotransferase class-III                                 | 0.969 | 0.969 |
| Pyridoxal-dependent decarboxylase, C-terminal sheet domain | 0.981 | 0.987 |
| Aspartate/ornithine carbamoyltransferase                   | 0.988 | 0.968 |
| NADH ubiquinone oxidoreductase, 20 Kd subunit              | 0.995 | 0.994 |
| P or trefoil or TFF domain                                 | 0.984 | 1.000 |
| cytochrome p450                                            | 0.935 | 0.897 |
| Purple acid phosphatase                                    | 0.960 | 0.964 |
| calcium-binding protein -- parvalbumin-like                | 0.997 | 0.996 |
| PAS domain                                                 | 0.954 | 0.944 |
| thiamine pyrophosphate enzymes                             | 0.932 | 0.902 |
| PDZ Domain                                                 | 0.974 | 0.961 |
| Pectin/pectate lyase                                       | 0.957 | 0.965 |
| PEP-utilizing enzyme, mobile domain                        | 0.955 | 0.957 |
| metallopeptidase family M24                                | 0.976 | 0.975 |
| Assemblin (Peptidase family S21)                           | 0.977 | 0.967 |
| peroxidase                                                 | 0.980 | 0.978 |
| Phosphoglycerate mutase                                    | 0.974 | 0.972 |
| phosphoglycerate kinase                                    | 0.948 | 0.879 |
| PH domain                                                  | 0.929 | 0.926 |
| Phage integrase                                            | 0.921 | 0.869 |
| phycocyanin                                                | 0.984 | 0.979 |
| ciliate pheromone                                          | 0.931 | 0.951 |
| phospholipase A2                                           | 0.980 | 0.982 |
| oligosaccharide phosphorylase                              | 0.991 | 0.991 |
| Pilin (bacterial filament)                                 | 0.702 | 0.750 |
| Pyruvate kinase                                            | 0.971 | 0.942 |
| plant lipid-transfer proteins                              | 0.916 | 0.955 |
| plant toxin                                                | 0.992 | 0.984 |
| purine nucleoside phosphorylase                            | 0.971 | 0.954 |
| porin                                                      | 0.964 | 0.959 |
| serine proteinase inhibitor -- potato I-type               | 0.960 | 0.928 |
| pancreatic hormone                                         | 0.303 | 0.303 |
| inorganic pyrophosphatase                                  | 0.974 | 0.976 |
| Prokaryotic/plant carbonic anhydrase                       | 0.972 | 0.969 |
| profilin                                                   | 0.979 | 0.963 |
| Carboxypeptidase activation peptide                        | 0.984 | 0.980 |
| Proteasome A-type and B-type                               | 0.976 | 0.968 |
| immunoglobulin-binding domain                              | 0.987 | 0.987 |
| phosphoribosyltransferase                                  | 0.981 | 0.954 |

---

|                                                                               |       |       |
|-------------------------------------------------------------------------------|-------|-------|
| Photosystem I reaction centre subunit IV / Psae                               | 0.967 | 0.967 |
| Phosphotyrosine-binding (PTB) domain, phosphotyrosine-interaction (PI) domain | 0.952 | 0.921 |
| protein-tyrosine phosphatase                                                  | 0.991 | 0.984 |
| Site-specific recombinases                                                    | 0.774 | 0.774 |
| reductases                                                                    | 0.952 | 0.935 |
| DNA-binding repressor                                                         | 0.985 | 0.982 |
| Response regulator receiver domain                                            | 0.936 | 0.910 |
| Regulator of G protein signaling domain                                       | 0.964 | 0.961 |
| Rhodanese-like domain                                                         | 0.943 | 0.937 |
| picornavirus coat proteins                                                    | 0.709 | 0.619 |
| Ribosomal protein L1p/L10e family                                             | 0.807 | 0.807 |
| Ribosomal protein L6 domain                                                   | 0.969 | 0.950 |
| Ribosomal protein L7Ae/L30e/S12e/Gadd45 family                                | 0.924 | 0.920 |
| Ribosome inactivating protein                                                 | 0.971 | 0.967 |
| Ring finger                                                                   | 0.784 | 0.862 |
| Microbial ribonucleases                                                       | 1.000 | 0.997 |
| Ribonuclease HII                                                              | 0.993 | 0.997 |
| pancreatic ribonuclease                                                       | 0.977 | 0.972 |
| ribonuclease H                                                                | 0.956 | 0.969 |
| ribonucleotide-diphosphate reductase                                          | 0.965 | 0.957 |
| Ribosome recycling factor                                                     | 0.682 | 0.671 |
| RNA recognition motif. (a.k.a. RRM, RBD, or RNP domain)                       | 0.944 | 0.931 |
| rubredoxin                                                                    | 1.000 | 1.000 |
| Ribulose bisphosphate carboxylase large chain, catalytic domain               | 0.985 | 0.974 |
| Ribulose bisphosphate carboxylase large chain, N-terminal domain              | 0.962 | 0.961 |
| Ribulose bisphosphate carboxylase large chain                                 | 0.975 | 0.972 |
| Ribulose bisphosphate carboxylase, small chain                                | 0.997 | 0.995 |
| retroviral proteinase                                                         | 0.963 | 0.961 |
| S4 domain                                                                     | 1.000 | 0.913 |
| S-100/ICaBP type calcium binding protein                                      | 0.933 | 1.000 |
| SAP domain                                                                    | 0.947 | 0.918 |
| Bacterial extracellular solute-binding protein, family 1                      | 0.903 | 0.891 |
| long-chain scorpion toxin                                                     | 0.955 | 0.954 |
| short-chain dehydrogenases/reductases                                         | 0.958 | 0.943 |
| sea anemone toxin                                                             | 0.855 | 0.841 |
| serine proteinase -- bacterial                                                | 0.985 | 0.983 |
| serine proteinase - eukaryotic                                                | 0.984 | 0.978 |
| serine proteinase inhibitor -- serpin-type                                    | 0.985 | 0.977 |
| Src homology 2 domains                                                        | 0.948 | 0.932 |

---

|                                                                                   |       |       |
|-----------------------------------------------------------------------------------|-------|-------|
| Src homology 3 domains                                                            | 0.972 | 0.965 |
| S-lectin                                                                          | 0.989 | 0.975 |
| Sm protein                                                                        | 0.982 | 0.979 |
| Cu/Zn superoxide dismutase                                                        | 0.987 | 0.989 |
| Fe/Mn superoxide dismutase                                                        | 0.967 | 0.959 |
| serine proteinase inhibitor -- squash-type                                        | 0.864 | 0.858 |
| SRF-type transcription factor (DNA-binding and dimerisation domain)               | 0.967 | 0.961 |
| Staphylococcal/Streptococcal toxin                                                | 0.957 | 0.950 |
| soybean trypsin inhibitor (Kunitz)                                                | 0.969 | 0.961 |
| subtilase                                                                         | 0.961 | 0.957 |
| periplasmic binding protein -- sugar                                              | 0.958 | 0.934 |
| Sulfotransferase protein                                                          | 0.931 | 0.913 |
| snake venom metalloproteinase                                                     | 1.000 | 0.997 |
| TATA-box binding protein, C-terminal domain                                       | 0.991 | 0.975 |
| Transforming growth factor-beta (TGF-beta)                                        | 0.943 | 0.913 |
| Thaumatococcus                                                                    | 0.980 | 0.976 |
| thionin                                                                           | 0.963 | 0.963 |
| thioredoxin                                                                       | 0.622 | 0.619 |
| IPT/TIG domain                                                                    | 0.997 | 0.997 |
| Serine protease inhibitors                                                        | 0.803 | 0.811 |
| triose phosphate isomerase                                                        | 0.993 | 0.990 |
| zinc metalloproteinase, thermolysin-like                                          | 0.982 | 0.983 |
| thymidylate synthase                                                              | 0.983 | 0.977 |
| Tobacco mosaic virus coat                                                         | 0.959 | 0.950 |
| TNF(Tumor Necrosis Factor) family                                                 | 0.982 | 0.970 |
| Toprim domain                                                                     | 0.919 | 0.945 |
| snake toxin                                                                       | 0.873 | 0.854 |
| Scorpion short toxin                                                              | 0.896 | 0.952 |
| TPR Domain                                                                        | 0.522 | 0.656 |
| Transketolase, pyridine binding domain                                            | 0.951 | 0.958 |
| Transketolase, C-terminal domain                                                  | 0.940 | 0.966 |
| Transketolase, pyridine binding and C-terminal domains                            | 0.964 | 0.964 |
| Transthyretin (prealbumin)                                                        | 1.000 | 0.991 |
| transferrin                                                                       | 0.990 | 0.969 |
| tRNA synthetases class I (I, L, M and V), catalytic and anticodon-binding domains | 0.965 | 0.950 |
| tRNA synthetases class II (G, H, P and S)                                         | 0.959 | 0.955 |
| Putative tRNA binding domain                                                      | 0.949 | 0.938 |
| Cereal trypsin/alpha-amylase inhibitor family                                     | 0.920 | 0.905 |
| Tyrosine kinase, catalytic domain                                                 | 0.986 | 0.966 |

---



---

|                                                     |       |       |
|-----------------------------------------------------|-------|-------|
| Ubiquitin homologues                                | 1.000 | 1.000 |
| ubiquitin conjugating enzyme                        | 0.974 | 0.967 |
| Ubiquinol cytochrome reductase transmembrane region | 0.983 | 0.983 |
| UcrQ family                                         | 0.917 | 0.917 |
| uracil-DNA glycosylase                              | 0.998 | 0.995 |
| YjgF family                                         | 1.000 | 0.972 |
| WW domain                                           | 0.933 | 0.934 |
| xylose isomerase                                    | 0.991 | 0.989 |
| Yersinia virulence determinant (YopE)               | 0.957 | 0.960 |
| YgbB family                                         | 0.996 | 0.996 |
| zinc finger -- CCHH-type                            | 0.942 | 0.946 |

---
